# Supplementary material for: APOL1 renal risk variants have contrasting resistance and susceptibility associations with African trypanosomiasis
Source: eLife. 2017 May 24;6:e25461. doi: 10.7554/eLife.25461 (PMC5495568; doi:10.7554/eLife.25461)
Supplement: Table 1—source data 1. — *Individuals excluded from the APOL1 G1 association analysis. T.b.r: T.b. rhodesiense, G0: genotype compatible with the non-risk G0 allele for both rs73885319 and rs60910145, G1: genotype compatible with the G1 CKD risk allele for both rs73885319 and rs60910145, G1M: genotype compatible with the G1 CKD risk allele for rs60910145 and the non-risk G0 allele for rs73885319, G1G: genotype compatible with the G1 CKD risk allele for rs73885319 and the non-risk G0 allele for rs60910145, G2: genotype compatible with the G2 CKD risk allele for rs71785313. DOI: http://dx.doi.org/10.7554/eLife.25461.005 [file elife-25461-table1-data1.xlsx]

## Sheet: Table 1 – source data 1
SAMPLE TYPE	SAMPLE CODE	SNP GENOTYPE			DESIGNATED APOL1 GENOTYPE
		rs73885319 (G1G)	rs60910145 (G1M)	rs71785313 (G2)
		A>G	T>G	TTATAA>del6
Control	7	AA	TT	TTATAA - TTATAA	G0/G0
Control	14	AA	TT	TTATAA - del6	G0/G2
Control	15	AA	TT	TTATAA - TTATAA	G0/G0
Control	17	AA	TT	TTATAA - TTATAA	G0/G0
Control	21	AA	TT	TTATAA - del6	G0/G2
Control	22	AA	TT	TTATAA - TTATAA	G0/G0
Control	27	AA	TT	TTATAA - TTATAA	G0/G0
Control	33	AA	TT	TTATAA - TTATAA	G0/G0
Control	47	AA	TT	TTATAA - TTATAA	G0/G0
Control	50	AA	TT	TTATAA - TTATAA	G0/G0
Control	52	AA	TT	TTATAA - TTATAA	G0/G0
Control	53	AA	TT	TTATAA - TTATAA	G0/G0
Control	56	AA	TT	TTATAA - TTATAA	G0/G0
Control	57	AA	TT	TTATAA - del6	G0/G2
Control	58	AA	TT	TTATAA - TTATAA	G0/G0
Control	60	AA	TT	TTATAA - TTATAA	G0/G0
Control	71	AA	TT	TTATAA - TTATAA	G0/G0
Control	72	AA	TT	TTATAA - TTATAA	G0/G0
Control	75	AG	TG	TTATAA - TTATAA	G1/G0
Control	79	AA	TT	TTATAA - TTATAA	G0/G0
Control	82	AA	TT	TTATAA - TTATAA	G0/G0
Control	83	AA	TT	TTATAA - TTATAA	G0/G0
Control	85	AA	TT	TTATAA - TTATAA	G0/G0
Control	100	AA	TT	TTATAA - TTATAA	G0/G0
Control	101	AA	TT	TTATAA - TTATAA	G0/G0
Control	102	AA	TT	TTATAA - TTATAA	G0/G0
Control	104	AA	TT	TTATAA - TTATAA	G0/G0
Control	106	AA	TT	TTATAA - TTATAA	G0/G0
Control	110	AA	TT	TTATAA - TTATAA	G0/G0
Control	115	AA	TT	TTATAA - TTATAA	G0/G0
Control	119	AA	TT	TTATAA - TTATAA	G0/G0
Control	123	AA	TT	TTATAA - TTATAA	G0/G0
Control	126	AA	TT	TTATAA - TTATAA	G0/G0
Control	128	AA	TT	TTATAA - TTATAA	G0/G0
Control	135	AG	TG	TTATAA - TTATAA	G1/G0
Control	138	AA	TT	TTATAA - TTATAA	G0/G0
Control	140	AA	TT	TTATAA - TTATAA	G0/G0
Control	143	AA	TT	TTATAA - TTATAA	G0/G0
Control	144	AA	TT	TTATAA - TTATAA	G0/G0
Control	147	AA	TT	TTATAA - TTATAA	G0/G0
Control	150	AA	TT	TTATAA - TTATAA	G0/G0
Control	155	AA	TT	TTATAA - TTATAA	G0/G0
Control	157	AA	TT	TTATAA - TTATAA	G0/G0
Control	159	AA	TT	TTATAA - TTATAA	G0/G0
Control	161	AA	TT	TTATAA - del6	G0/G2
Control	166	AA	TT	TTATAA - del6	G0/G2
Control	175	AA	TT	TTATAA - TTATAA	G0/G0
Control	177	AA	TT	TTATAA - TTATAA	G0/G0
Control	178	AA	TT	TTATAA - TTATAA	G0/G0
Control	179	AA	TT	TTATAA - TTATAA	G0/G0
Control	182	AA	TT	TTATAA - TTATAA	G0/G0
Control	184	AA	TT	TTATAA - TTATAA	G0/G0
Control	186	AA	TT	TTATAA - TTATAA	G0/G0
Control	193	AA	TT	TTATAA - TTATAA	G0/G0
Control	200	AA	TT	TTATAA - TTATAA	G0/G0
Control	201	AA	TT	TTATAA - TTATAA	G0/G0
Control	202	AA	TT	TTATAA - TTATAA	G0/G0
Control	209	AA	TT	TTATAA - TTATAA	G0/G0
Control	210	AA	TT	TTATAA - TTATAA	G0/G0
Control	216	AA	TT	TTATAA - del6	G0/G2
Control	219	AG	TG	TTATAA - TTATAA	G1/G0
Control	221	AA	TT	TTATAA - TTATAA	G0/G0
Control	226	AG	TG	TTATAA - TTATAA	G1/G0
Control	227	AA	TT	TTATAA - TTATAA	G0/G0
Control	231	AA	TT	TTATAA - TTATAA	G0/G0
Control	233	AA	TT	TTATAA - TTATAA	G0/G0
Control	234	AA	TT	TTATAA - TTATAA	G0/G0
Control	238	AA	TT	TTATAA - TTATAA	G0/G0
Control	243	AA	TT	TTATAA - TTATAA	G0/G0
Control	249	AA	TT	TTATAA - TTATAA	G0/G0
Control	250	AA	TT	TTATAA - TTATAA	G0/G0
Control	258	AA	TT	TTATAA - TTATAA	G0/G0
Control	260	AA	TT	TTATAA - TTATAA	G0/G0
Control	265	AA	TT	TTATAA - TTATAA	G0/G0
Control	271	AA	TT	TTATAA - TTATAA	G0/G0
Control	272	AA	TT	TTATAA - TTATAA	G0/G0
Control	273	AA	TT	TTATAA - TTATAA	G0/G0
Control	280	AG	TG	TTATAA - TTATAA	G1/G0
Control	281	AA	TT	TTATAA - TTATAA	G0/G0
Control	282	AG	TG	TTATAA - TTATAA	G1/G0
Control	283	AA	TT	TTATAA - TTATAA	G0/G0
Control	284	AA	TT	TTATAA - TTATAA	G0/G0
Control	285	AA	TT	TTATAA - TTATAA	G0/G0
Control	295	AA	TT	TTATAA - TTATAA	G0/G0
Control	314	AA	TT	TTATAA - TTATAA	G0/G0
Control	316	AA	TT	TTATAA - TTATAA	G0/G0
Control	335	AA	TT	TTATAA - TTATAA	G0/G0
Control	341	AA	TT	TTATAA - TTATAA	G0/G0
Control	351	AA	TT	TTATAA - del6	G0/G2
Control	356	AA	TT	TTATAA - TTATAA	G0/G0
Control	364	AA	TT	TTATAA - TTATAA	G0/G0
Control	366	AA	TT	TTATAA - TTATAA	G0/G0
Control	368	AA	TT	TTATAA - del6	G0/G2
Control	374	AA	TT	TTATAA - TTATAA	G0/G0
Control	375	AA	TT	TTATAA - TTATAA	G0/G0
Control	376	AA	TT	TTATAA - TTATAA	G0/G0
Control	377	AA	TT	TTATAA - TTATAA	G0/G0
Control	378	AG	TG	TTATAA - TTATAA	G1/G0
Control	384	AA	TT	TTATAA - TTATAA	G0/G0
Control	395	AA	TT	TTATAA - TTATAA	G0/G0
Control	404	AA	TT	TTATAA - del6	G0/G2
Control	407	AA	TT	TTATAA - TTATAA	G0/G0
Control	422	AA	TT	TTATAA - TTATAA	G0/G0
Control	425	AA	TT	TTATAA - TTATAA	G0/G0
Control	429	AA	TT	TTATAA - TTATAA	G0/G0
Control	430	AA	TT	TTATAA - del6	G0/G2
Control	431	AA	TT	TTATAA - TTATAA	G0/G0
Control	434	AA	TT	TTATAA - TTATAA	G0/G0
Control	435	AA	TT	TTATAA - TTATAA	G0/G0
Control	437	AG	TG	TTATAA - del6	G1/G2
Control	447	AA	TT	TTATAA - TTATAA	G0/G0
Control	455	AA	TT	TTATAA - del6	G0/G2
Control	456	AA	TT	TTATAA - TTATAA	G0/G0
Control	457	AA	TT	TTATAA - TTATAA	G0/G0
Control	458	AA	TT	TTATAA - TTATAA	G0/G0
Control	459	AA	TT	TTATAA - TTATAA	G0/G0
Control	465	AA	TT	TTATAA - TTATAA	G0/G0
Control	468	AA	TT	TTATAA - TTATAA	G0/G0
Control	474	AA	TT	TTATAA - TTATAA	G0/G0
Control	486	AA	TT	TTATAA - TTATAA	G0/G0
Control	488	AA	TT	TTATAA - TTATAA	G0/G0
Control	494	AA	TT	TTATAA - TTATAA	G0/G0
Control	495	AG	TG	TTATAA - TTATAA	G1/G0
Control	497	AA	TT	TTATAA - TTATAA	G0/G0
Control	501	AA	TT	TTATAA - TTATAA	G0/G0
Control	502	AA	TT	TTATAA - TTATAA	G0/G0
Control	503	AG	TG	TTATAA - TTATAA	G1/G0
Control	508	AA	TT	TTATAA - TTATAA	G0/G0
Control	509	AA	TT	TTATAA - del6	G0/G2
Control	510	AA	TT	TTATAA - del6	G0/G2
Control	514	AA	TT	TTATAA - TTATAA	G0/G0
Control	519	AA	TT	TTATAA - TTATAA	G0/G0
Control	521	AA	TT	TTATAA - del6	G0/G2
Control	523	AA	TT	TTATAA - TTATAA	G0/G0
Control	524	AA	TT	TTATAA - TTATAA	G0/G0
Control	527	AA	TT	TTATAA - TTATAA	G0/G0
Control	531	AA	TT	TTATAA - TTATAA	G0/G0
Control	533	AA	TT	TTATAA - TTATAA	G0/G0
Control	539	AA	TT	TTATAA - TTATAA	G0/G0
Control	542	AA	TT	TTATAA - TTATAA	G0/G0
Control	543	AA	TT	TTATAA - TTATAA	G0/G0
Control	544	AA	TT	TTATAA - TTATAA	G0/G0
Control	546	AA	TT	TTATAA - TTATAA	G0/G0
Control	556	AA	TT	TTATAA - del6	G0/G2
Control	568	AA	TT	TTATAA - del6	G0/G2
Control	571	AA	TT	TTATAA - TTATAA	G0/G0
Control	583	AA	TT	TTATAA - TTATAA	G0/G0
Control	584	AA	TT	TTATAA - TTATAA	G0/G0
Control	585	AA	TT	TTATAA - TTATAA	G0/G0
Control	603	AA	TT	TTATAA - del6	G0/G2
Control	605	AA	TT	TTATAA - TTATAA	G0/G0
Control	607	AG	TG	TTATAA - TTATAA	G1/G0
Control	608	AA	TT	TTATAA - TTATAA	G0/G0
Control	609	AA	TT	TTATAA - TTATAA	G0/G0
Control	19-1	AA	TT	TTATAA - TTATAA	G0/G0
Control	19-2	AA	TT	TTATAA - del6	G0/G2
Control	181-1	AA	TT	TTATAA - del6	G0/G2
Control	181-2	AA	TT	TTATAA - TTATAA	G0/G0
Control	228-1	AA	TT	TTATAA - TTATAA	G0/G0
Control	228-2	AA	TT	TTATAA - del6	G0/G2
Control	342-1	AA	TT	TTATAA - TTATAA	G0/G0
Control	342-2	AA	TT	TTATAA - TTATAA	G0/G0
Control	448-1	AG	TG	TTATAA - TTATAA	G1/G0
Control	448-2	AA	TT	TTATAA - TTATAA	G0/G0
Control	74-1	AA	TT	TTATAA - TTATAA	G0/G0
Control	74-2	AA	TT	TTATAA - del6	G0/G2
Control	CT059	AA	TT	TTATAA - del6	G0/G2
Control	FU363	AA	TT	TTATAA - del6	G0/G2
Control	FU365	AA	TT	TTATAA - TTATAA	G0/G0
Control	LAC066	AA	TT	TTATAA - TTATAA	G0/G0
Control	LAC1403	AA	TT	TTATAA - TTATAA	G0/G0
Control	LAC1528	AA	TT	TTATAA - del6	G0/G2
Control	LAC1616	AA	TT	TTATAA - del6	G0/G2
Control	LAC2102	AA	TT	TTATAA - TTATAA	G0/G0
Control	LAC2169	AA	TT	TTATAA - TTATAA	G0/G0
Control	LAC2295	AA	TT	TTATAA - TTATAA	G0/G0
Control	LAC482	AA	TT	TTATAA - TTATAA	G0/G0
Control	LAC589	AA	TT	TTATAA - TTATAA	G0/G0
Control	LAC799	AA	TT	TTATAA - TTATAA	G0/G0
Control	RT12	AA	TT	TTATAA - TTATAA	G0/G0
T.b.r Case	LIL001	AA	TT	TTATAA - TTATAA	G0/G0
T.b.r Case	LIL002	AA	TT	TTATAA - TTATAA	G0/G0
T.b.r Case	LIL003	AA	TT	TTATAA - TTATAA	G0/G0
T.b.r Case	LIL004	AA	TT	TTATAA - TTATAA	G0/G0
T.b.r Case	LIL005	AA	TT	TTATAA - TTATAA	G0/G0
T.b.r Case	LIL006	AA	TT	TTATAA - TTATAA	G0/G0
T.b.r Case	LIL007	AA	TT	TTATAA - TTATAA	G0/G0
T.b.r Case	LIL008	AA	TT	TTATAA - TTATAA	G0/G0
T.b.r Case	LIL009	AA	TT	TTATAA - TTATAA	G0/G0
T.b.r Case	LIL010	AA	TT	TTATAA - TTATAA	G0/G0
T.b.r Case	LIL011	AA	TT	TTATAA - TTATAA	G0/G0
T.b.r Case	LIL012	AA	TT	TTATAA - TTATAA	G0/G0
T.b.r Case	LIL013	AA	TT	TTATAA - TTATAA	G0/G0
T.b.r Case	LIL014	AA	TT	TTATAA - TTATAA	G0/G0
T.b.r Case	LIL015	AG	TG	TTATAA - TTATAA	G1/G0
T.b.r Case	LIL016	AA	TT	TTATAA - TTATAA	G0/G0
T.b.r Case	LIL017	AA	TT	TTATAA - TTATAA	G0/G0
T.b.r Case	LIL018	AA	TT	TTATAA - del6	G0/G2
T.b.r Case	LIL019	AA	TT	TTATAA - TTATAA	G0/G0
T.b.r Case	LIL020	AA	TT	TTATAA - TTATAA	G0/G0
T.b.r Case	LIL021	AA	TT	TTATAA - TTATAA	G0/G0
T.b.r Case	LIL022	AA	TT	TTATAA - TTATAA	G0/G0
T.b.r Case	LIL023	AA	TT	TTATAA - TTATAA	G0/G0
T.b.r Case	LIL024	AA	TT	TTATAA - del6	G0/G2
T.b.r Case	LIL025	AA	TT	TTATAA - TTATAA	G0/G0
T.b.r Case	LIL026	AA	TT	TTATAA - TTATAA	G0/G0
T.b.r Case	LIL027	AA	TT	TTATAA - TTATAA	G0/G0
T.b.r Case	LIL028	AA	TT	TTATAA - TTATAA	G0/G0
T.b.r Case	LIL029	AA	TT	TTATAA - TTATAA	G0/G0
T.b.r Case	LIL030	AA	TT	TTATAA - TTATAA	G0/G0
T.b.r Case	LIL032	AA	TT	TTATAA - TTATAA	G0/G0
T.b.r Case	LIL033	AA	TT	TTATAA - TTATAA	G0/G0
T.b.r Case	LIL034	AA	TT	TTATAA - TTATAA	G0/G0
T.b.r Case	LIL035a	AG	TT	TTATAA - TTATAA	G1G/G0
T.b.r Case	LIL036	AA	TT	TTATAA - TTATAA	G0/G0
T.b.r Case	LIL037	AA	TT	TTATAA - TTATAA	G0/G0
T.b.r Case	LIL038	AA	TT	TTATAA - TTATAA	G0/G0
T.b.r Case	LIL039	AA	TT	TTATAA - del6	G0/G2
T.b.r Case	LIL040	AA	TT	TTATAA - TTATAA	G0/G0
T.b.r Case	LIL041	AA	TT	TTATAA - TTATAA	G0/G0
T.b.r Case	LIL042	AA	TT	TTATAA - TTATAA	G0/G0
T.b.r Case	LIL043	AA	TT	TTATAA - TTATAA	G0/G0
T.b.r Case	LIL044	AA	TT	TTATAA - TTATAA	G0/G0
T.b.r Case	LIL045	AA	TT	TTATAA - TTATAA	G0/G0
T.b.r Case	LIL046	AA	TT	TTATAA - TTATAA	G0/G0
T.b.r Case	LIL047	AA	TT	TTATAA - TTATAA	G0/G0
T.b.r Case	LIL048	AA	TT	TTATAA - TTATAA	G0/G0
T.b.r Case	LIL049	AA	TT	TTATAA - TTATAA	G0/G0
T.b.r Case	LIL050	AA	TT	TTATAA - TTATAA	G0/G0
T.b.r Case	LIL051	AA	TT	TTATAA - TTATAA	G0/G0
T.b.r Case	LIL057	AA	TT	TTATAA - TTATAA	G0/G0
T.b.r Case	LIL058	AA	TT	TTATAA - TTATAA	G0/G0
T.b.r Case	LIL059	AA	TT	TTATAA - TTATAA	G0/G0
T.b.r Case	LIL060	AA	TT	TTATAA - TTATAA	G0/G0
T.b.r Case	LIL061	AA	TT	TTATAA - TTATAA	G0/G0
T.b.r Case	LIL062	AA	TT	TTATAA - TTATAA	G0/G0
T.b.r Case	LIL063	AA	TT	TTATAA - TTATAA	G0/G0
T.b.r Case	LIL064	AA	TT	TTATAA - TTATAA	G0/G0
T.b.r Case	LIL065	AA	TT	TTATAA - TTATAA	G0/G0
T.b.r Case	LIL066	AA	TT	TTATAA - TTATAA	G0/G0
T.b.r Case	LIL067	AA	TT	TTATAA - TTATAA	G0/G0
T.b.r Case	LIL068	AA	TT	TTATAA - TTATAA	G0/G0
T.b.r Case	LIL069	AA	TT	TTATAA - TTATAA	G0/G0
T.b.r Case	LIL070	AA	TT	TTATAA - TTATAA	G0/G0
T.b.r Case	LIL071	AG	TG	TTATAA - TTATAA	G1/G0
T.b.r Case	LIL072	AA	TT	TTATAA - TTATAA	G0/G0
T.b.r Case	LIL073	AG	TG	TTATAA - TTATAA	G1/G0
T.b.r Case	LIL074	AA	TT	TTATAA - TTATAA	G0/G0
T.b.r Case	LIL075	AA	TT	TTATAA - TTATAA	G0/G0
T.b.r Case	LIL076	AA	TT	TTATAA - TTATAA	G0/G0
T.b.r Case	LIL078A1	AA	TT	TTATAA - TTATAA	G0/G0
T.b.r Case	LIL078A2	AA	TT	TTATAA - TTATAA	G0/G0
T.b.r Case	LIL079	AA	TT	TTATAA - TTATAA	G0/G0
T.b.r Case	LIL080	AA	TT	TTATAA - TTATAA	G0/G0
T.b.r Case	LIL081	AA	TT	TTATAA - TTATAA	G0/G0
T.b.r Case	LIL082	AA	TT	TTATAA - TTATAA	G0/G0
T.b.r Case	LIL083	AA	TT	TTATAA - TTATAA	G0/G0
T.b.r Case	LIL084	AA	TT	TTATAA - TTATAA	G0/G0
T.b.r Case	LIL085a	AG	TT	TTATAA - TTATAA	G1G/G0
T.b.r Case	LIL086	AA	TT	TTATAA - TTATAA	G0/G0
T.b.r Case	LIL087	AA	TT	TTATAA - TTATAA	G0/G0
T.b.r Case	LIL088	AA	TT	TTATAA - TTATAA	G0/G0
T.b.r Case	LIL089	AA	TT	TTATAA - TTATAA	G0/G0
T.b.r Case	LIL090	AA	TT	TTATAA - TTATAA	G0/G0
T.b.r Case	LIL091	AA	TT	TTATAA - TTATAA	G0/G0
T.b.r Case	LIL092	AA	TT	TTATAA - TTATAA	G0/G0
T.b.r Case	LIL093	AA	TT	TTATAA - TTATAA	G0/G0
T.b.r Case	LIL094	AA	TT	TTATAA - TTATAA	G0/G0
T.b.r Case	LIL095	AA	TT	TTATAA - TTATAA	G0/G0
T.b.r Case	LIL096	AA	TT	TTATAA - TTATAA	G0/G0
T.b.r Case	LIL097	AA	TT	TTATAA - TTATAA	G0/G0
T.b.r Case	LIL098	AA	TT	TTATAA - TTATAA	G0/G0
T.b.r Case	LIL099	AA	TT	TTATAA - TTATAA	G0/G0
T.b.r Case	LIL100	AG	TG	TTATAA - TTATAA	G1/G0
T.b.r Case	LIL101	AA	TT	TTATAA - del6	G0/G2
T.b.r Case	LIL102	AA	TT	TTATAA - TTATAA	G0/G0
T.b.r Case	LIL103	AA	TT	TTATAA - TTATAA	G0/G0
T.b.r Case	LIL104	AA	TT	TTATAA - TTATAA	G0/G0
T.b.r Case	LIL138	AA	TT	TTATAA - TTATAA	G0/G0
T.b.r Case	SER001	AA	TT	TTATAA - TTATAA	G0/G0
T.b.r Case	SER002	AA	TT	TTATAA - TTATAA	G0/G0
T.b.r Case	SER003	AA	TT	TTATAA - TTATAA	G0/G0
T.b.r Case	SER004	AA	TT	TTATAA - TTATAA	G0/G0
T.b.r Case	SER006	AA	TT	TTATAA - TTATAA	G0/G0
T.b.r Case	SER007	AA	TT	TTATAA - TTATAA	G0/G0
T.b.r Case	SER008	AA	TT	TTATAA - TTATAA	G0/G0
T.b.r Case	SER009	AA	TT	TTATAA - TTATAA	G0/G0
T.b.r Case	SER010	AA	TT	TTATAA - TTATAA	G0/G0
T.b.r Case	SER011	AA	TT	TTATAA - TTATAA	G0/G0
T.b.r Case	SER012	AG	TG	TTATAA - TTATAA	G1/G0
T.b.r Case	SER013	AA	TT	TTATAA - TTATAA	G0/G0
T.b.r Case	SER014	AA	TT	TTATAA - TTATAA	G0/G0
T.b.r Case	SER016	AG	TG	TTATAA - TTATAA	G1/G0
T.b.r Case	SER017	AA	TT	TTATAA - TTATAA	G0/G0
T.b.r Case	SER018	AA	TT	TTATAA - TTATAA	G0/G0
T.b.r Case	SER020	AA	TT	TTATAA - TTATAA	G0/G0
T.b.r Case	SER022	AA	TT	TTATAA - TTATAA	G0/G0
T.b.r Case	SER023	AA	TT	TTATAA - TTATAA	G0/G0
T.b.r Case	SER024	AA	TT	TTATAA - TTATAA	G0/G0
T.b.r Case	SER025	AA	TT	TTATAA - TTATAA	G0/G0
T.b.r Case	SER026	AA	TT	TTATAA - TTATAA	G0/G0
T.b.r Case	SER027	AA	TT	TTATAA - TTATAA	G0/G0
T.b.r Case	SER028	AA	TT	TTATAA - TTATAA	G0/G0
T.b.r Case	SER029	AA	TT	TTATAA - TTATAA	G0/G0
T.b.r Case	SER030	AA	TT	TTATAA - TTATAA	G0/G0
T.b.r Case	SER031	AA	TT	TTATAA - TTATAA	G0/G0
T.b.r Case	SER032	AA	TT	TTATAA - TTATAA	G0/G0
T.b.r Case	SER033	AA	TT	TTATAA - TTATAA	G0/G0
T.b.r Case	SER034	AA	TT	TTATAA - TTATAA	G0/G0
T.b.r Case	SER035	AA	TT	TTATAA - TTATAA	G0/G0
T.b.r Case	SER036	AA	TT	TTATAA - TTATAA	G0/G0
T.b.r Case	SER037	AA	TT	TTATAA - TTATAA	G0/G0
T.b.r Case	SER039	AA	TT	TTATAA - TTATAA	G0/G0
T.b.r Case	SER040	AA	TT	TTATAA - TTATAA	G0/G0
T.b.r Case	SER041	AA	TT	TTATAA - TTATAA	G0/G0
T.b.r Case	SER042	AA	TT	TTATAA - del6	G0/G2
T.b.r Case	SER044	AA	TT	TTATAA - TTATAA	G0/G0
T.b.r Case	SER045	AA	TT	TTATAA - TTATAA	G0/G0
T.b.r Case	SER047	AA	TT	TTATAA - TTATAA	G0/G0
T.b.r Case	SER048	AA	TT	TTATAA - TTATAA	G0/G0
T.b.r Case	SER049	AA	TT	TTATAA - TTATAA	G0/G0
T.b.r Case	SER050	AA	TT	TTATAA - TTATAA	G0/G0
T.b.r Case	SER051	AA	TT	TTATAA - TTATAA	G0/G0
T.b.r Case	SER052	AA	TT	TTATAA - TTATAA	G0/G0
T.b.r Case	SER053	AA	TT	TTATAA - TTATAA	G0/G0
T.b.r Case	SER054	AA	TT	TTATAA - TTATAA	G0/G0
T.b.r Case	SER055	AA	TT	TTATAA - TTATAA	G0/G0
T.b.r Case	SER056	AA	TT	TTATAA - TTATAA	G0/G0
T.b.r Case	SER057	AA	TT	TTATAA - TTATAA	G0/G0
T.b.r Case	SER058	AA	TT	TTATAA - TTATAA	G0/G0
T.b.r Case	SER059	AG	TG	TTATAA - TTATAA	G1/G0
T.b.r Case	SER060	AA	TT	TTATAA - TTATAA	G0/G0
T.b.r Case	SER061	AA	TT	TTATAA - TTATAA	G0/G0
T.b.r Case	SER062	AA	TT	TTATAA - TTATAA	G0/G0
T.b.r Case	SER063	AA	TT	TTATAA - TTATAA	G0/G0
T.b.r Case	SER064	AA	TT	TTATAA - TTATAA	G0/G0
T.b.r Case	SER065	AA	TT	TTATAA - del6	G0/G2
T.b.r Case	SER066	AA	TT	TTATAA - TTATAA	G0/G0
T.b.r Case	SER067	AA	TT	TTATAA - TTATAA	G0/G0
T.b.r Case	SER068	AA	TT	TTATAA - TTATAA	G0/G0
T.b.r Case	SER069	AA	TT	TTATAA - TTATAA	G0/G0
T.b.r Case	SER070	AA	TT	TTATAA - TTATAA	G0/G0
T.b.r Case	SER071	AA	TT	TTATAA - TTATAA	G0/G0
T.b.r Case	SER072	AA	TT	TTATAA - TTATAA	G0/G0
T.b.r Case	SER073	AA	TT	TTATAA - TTATAA	G0/G0
T.b.r Case	SER074	AA	TT	TTATAA - TTATAA	G0/G0
T.b.r Case	SER075	AA	TT	TTATAA - TTATAA	G0/G0
T.b.r Case	SER076	AA	TT	TTATAA - TTATAA	G0/G0
T.b.r Case	SER077	AA	TT	TTATAA - TTATAA	G0/G0
T.b.r Case	SER078	AG	TG	TTATAA - TTATAA	G1/G0
T.b.r Case	SER079	AA	TT	TTATAA - TTATAA	G0/G0
T.b.r Case	SER080	AA	TT	TTATAA - TTATAA	G0/G0
T.b.r Case	SER081	AA	TT	TTATAA - TTATAA	G0/G0
T.b.r Case	SER082	AA	TT	TTATAA - TTATAA	G0/G0
T.b.r Case	SER083	AA	TT	TTATAA - TTATAA	G0/G0
T.b.r Case	SER084	AA	TT	TTATAA - TTATAA	G0/G0
T.b.r Case	SER085	AA	TT	TTATAA - TTATAA	G0/G0
T.b.r Case	SER086	AA	TT	TTATAA - TTATAA	G0/G0
T.b.r Case	SER087	AA	TT	TTATAA - TTATAA	G0/G0
T.b.r Case	SER093	AA	TT	TTATAA - TTATAA	G0/G0
T.b.r Case	SER098	AA	TT	TTATAA - TTATAA	G0/G0
T.b.r Case	SER105	AA	TT	TTATAA - TTATAA	G0/G0
T.b.r Case	SER108	AG	TG	TTATAA - TTATAA	G1/G0
T.b.r Case	SER111	AA	TT	TTATAA - TTATAA	G0/G0

## Sheet: Table 1 - source data 2
APOL1 G1 CKD risk variant	Genotype	Dominant model - Infection
		T.b.r infected		Control		Association analysis T.b.r infected/Control
		Number	%	Number	%	OR [95% CI]	P
rs73885319	A>G
G1G	A/G or G/G	11	6	12	6.7	0.89 [0.37 to 2.11]	0.79
Ancestral	A/A	173	94	168	93.3
Total		184	100	180	100
rs60910145	T>G
G1M	T/G or G/G	9	4.9	12	6.7	0.72 [0.29 to 1.78]	0.48
Ancestral	T/T	175	95.1	168	93.3
Total		184	100	180	100
