# Supplementary material for: APOL1 renal risk variants have contrasting resistance and susceptibility associations with African trypanosomiasis
Source: eLife. 2017 May 24;6:e25461. doi: 10.7554/eLife.25461 (PMC5495568; doi:10.7554/eLife.25461)
Supplement: Table 2—source data 1. — *Individuals excluded from the APOL1 G1 association analysis. T.b.g: T.b. gambiense, G0: genotype compatible with the non-risk G0 allele for both rs73885319 and rs60910145, G1: genotype compatible with the G1 CKD risk allele for both rs73885319 and rs60910145, G1M: genotype compatible with the G1 CKD risk allele for rs60910145 and the non-risk G0 allele for rs73885319, G1G: genotype compatible with the G1 CKD risk allele for rs73885319 and the non-risk G0 allele for rs60910145, G2: genotype compatible with the G2 CKD risk allele for rs71785313. DOI: http://dx.doi.org/10.7554/eLife.25461.008 [file elife-25461-table2-data1.xlsx]

## Sheet: Table 2 – source data 1
SAMPLE TYPE	SAMPLE CODE	SNP GENOTYPE			DESIGNATED APOL1 GENOTYPE
		rs73885319 (G1G)	rs60910145 (G1M)	rs71785313 (G2)
		A>G	T>G	TTATAA>del6
Control	Bo10-1	AG	TG	TTATAA - TTATAA	G1/G0
Control	Bo109-6	AA	TT	del6 - del6	G2/G2
Control	Bo78-1	AA	TT	TTATAA - del6	G0/G2
Control	Bo81-1	AA	TT	TTATAA - del6	G0/G2
Control	Bo86-2	AA	TT	TTATAA - del6	G0/G2
Control	Bo87-2	AG	TG	TTATAA - TTATAA	G1/G0
Control	Bo88-6	AA	TT	del6 - del6	G2/G2
Control	Bo91-1	AG	TG	TTATAA - TTATAA	G1/G0
Control	Bo94-6	AA	TT	TTATAA - del6	G0/G2
Control	Bo97-6	AA	TT	TTATAA - TTATAA	G0/G0
Control	Bo98-6	AA	TT	TTATAA - del6	G0/G2
Control	C4	AA	TT	TTATAA - del6	G0/G2
Control	C5	AA	TT	TTATAA - del6	G0/G2
Control	C6	AG	TG	TTATAA - del6	G1/G2
Control	C7	AG	TG	TTATAA - TTATAA	G1/G0
Control	C8	AA	TT	TTATAA - del6	G0/G2
Control	Du13-1	AA	TT	TTATAA - TTATAA	G0/G0
Control	Du13-16	AA	TT	TTATAA - TTATAA	G0/G0
Control	Du13-2	AA	TT	TTATAA - TTATAA	G0/G0
Control	Du19-1	AA	TT	TTATAA - TTATAA	G0/G0
Control	Du19-9	AA	TT	TTATAA - TTATAA	G0/G0
Control	Du20-15	AA	TT	TTATAA - TTATAA	G0/G0
Control	Du20-16	AA	TT	TTATAA - del6	G0/G2
Control	Du227-6	AG	TG	TTATAA - TTATAA	G1/G0
Control	Du237-2a	AG	TT	TTATAA - TTATAA	G1G/G0
Control	Du253-1	AA	TT	TTATAA - TTATAA	G0/G0
Control	Du253-2	AG	TG	TTATAA - TTATAA	G1/G0
Control	Du26-15	AG	TG	TTATAA - TTATAA	G1/G0
Control	Du260-1	AG	TG	TTATAA - TTATAA	G1/G0
Control	Du27-2	AA	TT	TTATAA - del6	G0/G2
Control	Du27-7	AA	TT	TTATAA - del6	G0/G2
Control	Du27-9	AA	TT	TTATAA - TTATAA	G0/G0
Control	Du31-9	AA	TT	TTATAA - TTATAA	G0/G0
Control	Du34-1	AA	TT	TTATAA - del6	G0/G2
Control	Du34-15	AA	TT	TTATAA - TTATAA	G0/G0
Control	Du34-2	AA	TT	TTATAA - del6	G0/G2
Control	Du36-15	AG	TG	TTATAA - del6	G1/G2
Control	Du37-16	AA	TT	TTATAA - TTATAA	G0/G0
Control	Du38-16	AA	TT	TTATAA - del6	G0/G2
Control	Du38-18	AG	TG	TTATAA - del6	G1/G2
Control	Du39-6	AA	TT	TTATAA - TTATAA	G0/G0
Control	Du40-1	AA	TT	TTATAA - del6	G0/G2
Control	Du401-6	AG	TG	TTATAA - TTATAA	G1/G0
Control	Du41-1	GG	GG	TTATAA - TTATAA	G1/G1
Control	Du43-1	AA	TT	TTATAA - del6	G0/G2
Control	Du44-1	AA	TT	TTATAA - del6	G0/G2
Control	Du45-1	AG	TG	TTATAA - TTATAA	G1/G0
Control	Du47-6	AA	TT	TTATAA - del6	G0/G2
Control	Du49-6	AG	TG	TTATAA - del6	G1/G2
Control	Du54-1	AA	TT	TTATAA - TTATAA	G0/G0
Control	Du55-6	AG	TG	TTATAA - TTATAA	G1/G0
Control	Du56-6	AA	TT	TTATAA - TTATAA	G0/G0
Control	Du57-1	AA	TT	TTATAA - del6	G0/G2
Control	Du61-1	AG	TG	TTATAA - del6	G1/G2
Control	Du62-1	AA	TT	TTATAA - TTATAA	G0/G0
Control	Du63-1	AA	TT	TTATAA - TTATAA	G0/G0
Control	Du64-1	AA	TT	TTATAA - TTATAA	G0/G0
Control	Du65-1	AA	TT	TTATAA - TTATAA	G0/G0
Control	Du68-6	AA	TT	TTATAA - TTATAA	G0/G0
Control	Du72-1	AA	TT	TTATAA - TTATAA	G0/G0
Control	Du72-2	AG	TG	TTATAA - TTATAA	G1/G0
Control	Du73-6	AG	TG	TTATAA - TTATAA	G1/G0
Control	Du74-1	AA	TT	TTATAA - TTATAA	G0/G0
Control	Du75-6	AA	TT	TTATAA - TTATAA	G0/G0
Control	Fo1-17	AA	TT	TTATAA - TTATAA	G0/G0
Control	Fo10-7	GG	TG	TTATAA - TTATAA	G1G/G1
Control	Fo11-8	AA	TT	TTATAA - TTATAA	G0/G0
Control	Fo12-2	AA	TT	TTATAA - TTATAA	G0/G0
Control	Fo14-1	AA	TT	TTATAA - TTATAA	G0/G0
Control	Fo19-1	AG	TG	TTATAA - TTATAA	G1/G0
Control	Fo19-2	AA	TT	TTATAA - TTATAA	G0/G0
Control	Fo2-1	AA	TT	TTATAA - del6	G0/G2
Control	Fo21-15	AA	TT	TTATAA - TTATAA	G0/G0
Control	Fo21-3	AA	TT	del6 - del6	G2/G2
Control	Fo22-1	AG	TG	TTATAA - TTATAA	G1/G0
Control	Fo22-15	AA	TT	TTATAA - del6	G0/G2
Control	Fo22-2	AA	TT	TTATAA - TTATAA	G0/G0
Control	Fo23-15	AG	TG	TTATAA - TTATAA	G1/G0
Control	Fo25-15	AA	TT	TTATAA - del6	G0/G2
Control	Fo28-2	AG	TG	TTATAA - del6	G1/G2
Control	Fo34-1	AA	TT	TTATAA - TTATAA	G0/G0
Control	Fo36-1a	AG	TT	TTATAA - TTATAA	G1G/G0
Control	Fo4-1	AA	TT	TTATAA - TTATAA	G0/G0
Control	Fo43-15	AG	TG	TTATAA - TTATAA	G1/G0
Control	Fo47-1	AA	TT	TTATAA - TTATAA	G0/G0
Control	Fo47-2	GG	GG	TTATAA - TTATAA	G1/G1
Control	Fo51-1	AG	TG	TTATAA - TTATAA	G1/G0
Control	Fo53-6	AG	TG	TTATAA - del6	G1/G2
Control	Fo55-1	AA	TT	TTATAA - TTATAA	G0/G0
Control	Fo56-1	AA	TT	TTATAA - TTATAA	G0/G0
Control	Fo58-1	AA	TT	TTATAA - TTATAA	G0/G0
Control	Fo58-16	AG	TG	TTATAA - del6	G1/G2
Control	Fo58-7	AA	TT	TTATAA - TTATAA	G0/G0
Control	Fo60-1	AA	TT	TTATAA - TTATAA	G0/G0
Control	Fo61-1	AA	TT	del6 - del6	G2/G2
Control	Fo64-1	AA	TT	TTATAA - TTATAA	G0/G0
Control	Fo65-1	AA	TT	TTATAA - TTATAA	G0/G0
Control	Fo66-1	AA	TT	TTATAA - TTATAA	G0/G0
Control	Fo67-1	AG	TG	TTATAA - TTATAA	G1/G0
Control	Fo68-2	AA	TT	TTATAA - TTATAA	G0/G0
Control	Fo69-1	AA	TT	TTATAA - TTATAA	G0/G0
Control	Fo70-2	AA	TT	TTATAA - TTATAA	G0/G0
Control	Fo70-7	AA	TT	TTATAA - TTATAA	G0/G0
Control	Fo9-1	AA	TT	TTATAA - del6	G0/G2
T.b.g infected	A52	AA	TT	TTATAA - del6	G0/G2
T.b.g infected	A53	AG	TG	TTATAA - del6	G1/G2
T.b.g infected	A54	AA	TT	TTATAA - del6	G0/G2
T.b.g infected	A57	AA	TT	TTATAA - del6	G0/G2
T.b.g infected	Bo1-6	AA	TT	del6 - del6	G2/G2
T.b.g infected	Bo10-6	AG	TG	TTATAA - TTATAA	G1/G0
T.b.g infected	Bo101-2	AA	TT	TTATAA - TTATAA	G0/G0
T.b.g infected	Bo110-6	GG	GG	TTATAA - TTATAA	G1/G1
T.b.g infected	Bo2-6	AG	TG	TTATAA - TTATAA	G1/G0
T.b.g infected	Bo230-6a	AG	TT	TTATAA - TTATAA	G1G/G0
T.b.g infected	Bo270-1	AA	TT	TTATAA - TTATAA	G0/G0
T.b.g infected	Bo271-1	AA	TT	TTATAA - del6	G0/G2
T.b.g infected	Bo271-2	AA	TT	TTATAA - TTATAA	G0/G0
T.b.g infected	Bo273-2	AG	TG	TTATAA - TTATAA	G1/G0
T.b.g infected	Bo274-2	AA	TT	TTATAA - TTATAA	G0/G0
T.b.g infected	Bo276-6	AA	TT	TTATAA - del6	G0/G2
T.b.g infected	Bo277-2	AG	TG	TTATAA - TTATAA	G1/G0
T.b.g infected	Bo278-2	AG	TG	TTATAA - TTATAA	G1/G0
T.b.g infected	Bo280-1	AA	TT	TTATAA - del6	G0/G2
T.b.g infected	Bo284-1	AG	TG	TTATAA - TTATAA	G1/G0
T.b.g infected	Bo286-3a	AA	TG	TTATAA - TTATAA	G1M/G0
T.b.g infected	Bo288-6	AA	TT	TTATAA - TTATAA	G0/G0
T.b.g infected	Bo290-1	AG	TG	TTATAA - TTATAA	G1/G0
T.b.g infected	Bo292-1	AA	TT	del6 - del6	G2/G2
T.b.g infected	Bo294-2	AA	TT	del6 - del6	G2/G2
T.b.g infected	Bo296-1	AA	TT	TTATAA - del6	G0/G2
T.b.g infected	Bo298-1	AG	TG	TTATAA - TTATAA	G1/G0
T.b.g infected	Bo3-6	AA	TT	TTATAA - del6	G0/G2
T.b.g infected	Bo306-3	AG	TG	TTATAA - TTATAA	G1/G0
T.b.g infected	Bo308-1	AA	TT	TTATAA - del6	G0/G2
T.b.g infected	Bo310-1	AG	TG	TTATAA - TTATAA	G1/G0
T.b.g infected	Bo310-2	AG	TG	TTATAA - TTATAA	G1/G0
T.b.g infected	Bo312-2	AA	TT	TTATAA - TTATAA	G0/G0
T.b.g infected	Bo318-2	AA	TT	TTATAA - TTATAA	G0/G0
T.b.g infected	Bo320-1	AA	TT	TTATAA - TTATAA	G0/G0
T.b.g infected	Bo352-2	AA	TT	TTATAA - TTATAA	G0/G0
T.b.g infected	Bo354-1	AA	TT	TTATAA - TTATAA	G0/G0
T.b.g infected	Bo360-1	AG	TG	TTATAA - del6	G1/G2
T.b.g infected	Bo361-2	AA	TT	TTATAA - TTATAA	G0/G0
T.b.g infected	Bo366-1	AG	TG	TTATAA - TTATAA	G1/G0
T.b.g infected	Bo367-1	AG	TG	TTATAA - TTATAA	G1/G0
T.b.g infected	Bo4-6	AG	TG	TTATAA - TTATAA	G1/G0
T.b.g infected	Bo407-6	AA	TT	TTATAA - TTATAA	G0/G0
T.b.g infected	Bo412-6	AA	TT	TTATAA - TTATAA	G0/G0
T.b.g infected	Bo418-6	AA	TT	TTATAA - TTATAA	G0/G0
T.b.g infected	Bo441-6a	AA	GG	TTATAA - TTATAA	G1M/G1M
T.b.g infected	Bo442-6	AA	TT	TTATAA - TTATAA	G0/G0
T.b.g infected	Bo443-6a	AG	TT	TTATAA - del6	G1G/G2
T.b.g infected	Bo444-6	AA	TT	TTATAA - del6	G0/G2
T.b.g infected	Bo445-6	AA	TT	TTATAA - del6	G0/G2
T.b.g infected	Bo446-6a	AA	TG	TTATAA - TTATAA	G1M/G0
T.b.g infected	Bo447-6a	AG	TT	TTATAA - del6	G1G/G2
T.b.g infected	Bo458-6	AG	TG	TTATAA - TTATAA	G1/G0
T.b.g infected	Bo5-6	AA	TT	TTATAA - TTATAA	G0/G0
T.b.g infected	Bo6-6	AA	TT	TTATAA - del6	G0/G2
T.b.g infected	Bo7-6	AA	TT	del6 - del6	G2/G2
T.b.g infected	Bo8-10	AA	TT	TTATAA - TTATAA	G0/G0
T.b.g infected	Bo8-6	AA	TT	TTATAA - del6	G0/G2
T.b.g infected	Bo82-1	AA	TT	TTATAA - TTATAA	G0/G0
T.b.g infected	Bo82-6	AA	TT	TTATAA - TTATAA	G0/G0
T.b.g infected	Bo84-1	GG	GG	TTATAA - TTATAA	G1/G1
T.b.g infected	Bo9-6	AG	TG	TTATAA - del6	G1/G2
T.b.g infected	Bo90-1	AA	TT	TTATAA - TTATAA	G0/G0
T.b.g infected	Bo91-2	AA	TT	TTATAA - TTATAA	G0/G0
T.b.g infected	Bo91-7	AG	TG	TTATAA - TTATAA	G1/G0
T.b.g infected	Bo92-1	AG	TG	TTATAA - TTATAA	G1/G0
T.b.g infected	DCD	AA	TT	TTATAA - TTATAA	G0/G0
T.b.g infected	Do/333/340/2	AA	TT	TTATAA - TTATAA	G0/G0
T.b.g infected	Du 376-2	AA	TT	TTATAA - TTATAA	G0/G0
T.b.g infected	Du 376-6	AA	TT	TTATAA - TTATAA	G0/G0
T.b.g infected	Du 383-6	AG	TG	TTATAA - TTATAA	G1/G0
T.b.g infected	Du 385-6	AA	TT	TTATAA - TTATAA	G0/G0
T.b.g infected	Du 391-6	AA	TT	TTATAA - TTATAA	G0/G0
T.b.g infected	Du 394-6	AA	TT	TTATAA - TTATAA	G0/G0
T.b.g infected	Du 396-6	AA	TT	TTATAA - TTATAA	G0/G0
T.b.g infected	Du 403-6	AA	TT	TTATAA - TTATAA	G0/G0
T.b.g infected	Du 404-6	GG	GG	TTATAA - TTATAA	G1/G1
T.b.g infected	Du11-6	AA	TT	TTATAA - del6	G0/G2
T.b.g infected	Du111-6	AG	TG	TTATAA - TTATAA	G1/G0
T.b.g infected	Du113-6	AA	TT	TTATAA - del6	G0/G2
T.b.g infected	Du114-6	AA	TT	TTATAA - del6	G0/G2
T.b.g infected	Du115-6	AA	TT	TTATAA - del6	G0/G2
T.b.g infected	Du117-6	AA	TT	TTATAA - TTATAA	G0/G0
T.b.g infected	Du119-6	AA	TT	TTATAA - TTATAA	G0/G0
T.b.g infected	Du12-6	AA	TT	TTATAA - del6	G0/G2
T.b.g infected	Du121-6	AA	TT	TTATAA - del6	G0/G2
T.b.g infected	Du122-6	AA	TT	TTATAA - TTATAA	G0/G0
T.b.g infected	Du123-6	AA	TT	TTATAA - del6	G0/G2
T.b.g infected	Du125-6	AG	TG	TTATAA - TTATAA	G1/G0
T.b.g infected	Du126-6 (dcd)	AG	TG	TTATAA - TTATAA	G1/G0
T.b.g infected	Du128-6 (dcd)	AG	TG	TTATAA - TTATAA	G1/G0
T.b.g infected	Du129-6	AA	TT	TTATAA - TTATAA	G0/G0
T.b.g infected	Du13-15	AG	TG	TTATAA - del6	G1/G2
T.b.g infected	Du13-6	AA	TT	TTATAA - TTATAA	G0/G0
T.b.g infected	Du130-6	AA	TT	TTATAA - del6	G0/G2
T.b.g infected	Du131-6a	AG	TT	TTATAA - TTATAA	G1G/G0
T.b.g infected	Du132-6	AG	TG	TTATAA - TTATAA	G1/G0
T.b.g infected	Du135-6	AG	TG	TTATAA - TTATAA	G1/G0
T.b.g infected	Du136-6	AA	TT	TTATAA - TTATAA	G0/G0
T.b.g infected	Du137-6	AG	TG	TTATAA - TTATAA	G1/G0
T.b.g infected	Du14-6	AG	TG	TTATAA - TTATAA	G1/G0
T.b.g infected	Du141-6	AA	TT	TTATAA - TTATAA	G0/G0
T.b.g infected	Du142-6	AA	TT	TTATAA - TTATAA	G0/G0
T.b.g infected	Du143-6	AA	TT	TTATAA - TTATAA	G0/G0
T.b.g infected	Du144-6	AG	TG	TTATAA - TTATAA	G1/G0
T.b.g infected	Du148-6 (dcd)	AA	TT	TTATAA - del6	G0/G2
T.b.g infected	Du149-6	AA	TT	TTATAA - TTATAA	G0/G0
T.b.g infected	Du15-6	AA	TT	TTATAA - TTATAA	G0/G0
T.b.g infected	Du150-6	AA	TT	TTATAA - del6	G0/G2
T.b.g infected	Du152-6	AA	TT	TTATAA - TTATAA	G0/G0
T.b.g infected	Du153-2	AA	TT	TTATAA - del6	G0/G2
T.b.g infected	Du153-6	AA	TT	TTATAA - TTATAA	G0/G0
T.b.g infected	Du155-6 (dcd)	AA	TT	TTATAA - TTATAA	G0/G0
T.b.g infected	Du156-6	AA	TT	TTATAA - del6	G0/G2
T.b.g infected	Du157-6	GG	GG	TTATAA - TTATAA	G1/G1
T.b.g infected	Du158-6	AA	TT	TTATAA - TTATAA	G0/G0
T.b.g infected	Du16-6	AG	TG	TTATAA - TTATAA	G1/G0
T.b.g infected	Du16-7	AA	TT	TTATAA - TTATAA	G0/G0
T.b.g infected	Du160-6	AG	TG	TTATAA - del6	G1/G2
T.b.g infected	Du162-6	AG	TG	TTATAA - del6	G1/G2
T.b.g infected	Du163-6	AA	TT	TTATAA - TTATAA	G0/G0
T.b.g infected	Du165-6	AA	TT	TTATAA - TTATAA	G0/G0
T.b.g infected	Du167-6	AA	TT	del6 - del6	G2/G2
T.b.g infected	Du168-6 (dcd)	AA	TT	TTATAA - del6	G0/G2
T.b.g infected	Du169-6	AG	TG	TTATAA - TTATAA	G1/G0
T.b.g infected	Du17-6	AA	TT	TTATAA - TTATAA	G0/G0
T.b.g infected	Du170-6	AA	TT	TTATAA - del6	G0/G2
T.b.g infected	Du171-6	AA	TT	del6 - del6	G2/G2
T.b.g infected	Du172-6	AA	TT	TTATAA - del6	G0/G2
T.b.g infected	Du174-6	AA	TT	TTATAA - TTATAA	G0/G0
T.b.g infected	Du178-6	AG	TG	TTATAA - TTATAA	G1/G0
T.b.g infected	Du18-6	GG	GG	TTATAA - TTATAA	G1/G1
T.b.g infected	Du180-6	AG	TG	TTATAA - TTATAA	G1/G0
T.b.g infected	Du182-6	AG	TG	TTATAA - TTATAA	G1/G0
T.b.g infected	Du184-6	AA	TT	TTATAA - TTATAA	G0/G0
T.b.g infected	Du188-6	AA	TT	TTATAA - del6	G0/G2
T.b.g infected	Du19-6	AA	TT	TTATAA - TTATAA	G0/G0
T.b.g infected	Du190-6 (dcd)	AG	TG	TTATAA - del6	G1/G2
T.b.g infected	Du192-6	AG	TG	TTATAA - TTATAA	G1/G0
T.b.g infected	Du194-6	AA	TT	TTATAA - TTATAA	G0/G0
T.b.g infected	Du20-6	AA	TT	TTATAA - TTATAA	G0/G0
T.b.g infected	Du202-6	AA	TT	TTATAA - TTATAA	G0/G0
T.b.g infected	Du206-6	AG	TG	TTATAA - TTATAA	G1/G0
T.b.g infected	Du208-6	AG	TG	TTATAA - TTATAA	G1/G0
T.b.g infected	Du21-6	AA	TT	TTATAA - del6	G0/G2
T.b.g infected	Du210-6	AA	TT	TTATAA - TTATAA	G0/G0
T.b.g infected	Du212-6	AA	TT	TTATAA - TTATAA	G0/G0
T.b.g infected	Du213-6	GG	TG	TTATAA - TTATAA	G1G/G1
T.b.g infected	Du214-6	AA	TT	TTATAA - TTATAA	G0/G0
T.b.g infected	Du218-6	AA	TT	TTATAA - del6	G0/G2
T.b.g infected	Du22-6	AA	TT	TTATAA - TTATAA	G0/G0
T.b.g infected	Du22-9	AA	TT	TTATAA - TTATAA	G0/G0
T.b.g infected	Du220-6	GG	GG	TTATAA - TTATAA	G1/G1
T.b.g infected	Du222-6	AG	TG	TTATAA - del6	G1/G2
T.b.g infected	Du224-6	AA	TT	TTATAA - TTATAA	G0/G0
T.b.g infected	Du226-6 (dcd)	AA	TT	TTATAA - TTATAA	G0/G0
T.b.g infected	Du228-6	AA	TT	TTATAA - TTATAA	G0/G0
T.b.g infected	Du23-6	AA	TT	TTATAA - TTATAA	G0/G0
T.b.g infected	Du232-6	AA	TT	TTATAA - TTATAA	G0/G0
T.b.g infected	Du24-6	AG	TG	TTATAA - del6	G1/G2
T.b.g infected	Du248-6	AA	TT	TTATAA - TTATAA	G0/G0
T.b.g infected	Du249-6a	AG	TT	TTATAA - TTATAA	G1G/G0
T.b.g infected	Du25-6	AA	TT	TTATAA - TTATAA	G0/G0
T.b.g infected	Du257-6	AA	TT	TTATAA - TTATAA	G0/G0
T.b.g infected	Du26-6	AA	TT	TTATAA - TTATAA	G0/G0
T.b.g infected	Du27-6	AA	TT	TTATAA - TTATAA	G0/G0
T.b.g infected	Du28-6	AA	TT	TTATAA - TTATAA	G0/G0
T.b.g infected	Du29-6	AG	TG	TTATAA - TTATAA	G1/G0
T.b.g infected	Du30-6	AA	TT	TTATAA - del6	G0/G2
T.b.g infected	Du31-1	AA	TT	TTATAA - TTATAA	G0/G0
T.b.g infected	Du31-6	AA	TT	TTATAA - del6	G0/G2
T.b.g infected	Du32-6	AA	TT	TTATAA - TTATAA	G0/G0
T.b.g infected	Du33-6	AA	TT	TTATAA - del6	G0/G2
T.b.g infected	Du35-6	GG	GG	TTATAA - TTATAA	G1/G1
T.b.g infected	Du36-6	AA	TT	TTATAA - del6	G0/G2
T.b.g infected	Du37-15	AA	TT	TTATAA - del6	G0/G2
T.b.g infected	Du370-6	AG	TG	TTATAA - del6	G1/G2
T.b.g infected	Du38-21	AG	TG	TTATAA - TTATAA	G1/G0
T.b.g infected	Du38-6	AA	TT	TTATAA - TTATAA	G0/G0
T.b.g infected	Du42-6	GG	GG	TTATAA - TTATAA	G1/G1
T.b.g infected	Du46-6	AG	TG	TTATAA - TTATAA	G1/G0
T.b.g infected	Du50-6 (dcd)	AG	TG	TTATAA - del6	G1/G2
T.b.g infected	Du53-2 (dcd)	AG	TG	TTATAA - TTATAA	G1/G0
T.b.g infected	Du57-2	AA	TT	TTATAA - del6	G0/G2
T.b.g infected	Du66-6	AG	TG	TTATAA - TTATAA	G1/G0
T.b.g infected	Du70-1	AA	TT	TTATAA - TTATAA	G0/G0
T.b.g infected	Du72-6	AA	TT	TTATAA - TTATAA	G0/G0
T.b.g infected	Du77-6	AA	TT	TTATAA - del6	G0/G2
T.b.g infected	Fo1-1	AA	TT	TTATAA - TTATAA	G0/G0
T.b.g infected	Fo10-10	GG	TG	TTATAA - TTATAA	G1G/G1
T.b.g infected	Fo12-6	AA	TT	TTATAA - TTATAA	G0/G0
T.b.g infected	Fo15-2	AA	TT	TTATAA - del6	G0/G2
T.b.g infected	Fo17-1	AA	TT	TTATAA - TTATAA	G0/G0
T.b.g infected	Fo17-2	AA	TT	TTATAA - del6	G0/G2
T.b.g infected	Fo17-3	AA	TT	TTATAA - TTATAA	G0/G0
T.b.g infected	Fo20-1	AA	TT	TTATAA - TTATAA	G0/G0
T.b.g infected	Fo22-6	AG	TG	TTATAA - TTATAA	G1/G0
T.b.g infected	Fo23-6	AA	TT	TTATAA - del6	G0/G2
T.b.g infected	Fo24-6	AA	TT	TTATAA - TTATAA	G0/G0
T.b.g infected	Fo25-6	AA	TT	TTATAA - TTATAA	G0/G0
T.b.g infected	Fo29-2	AG	TG	TTATAA - TTATAA	G1/G0
T.b.g infected	Fo3-1	AA	TT	TTATAA - TTATAA	G0/G0
T.b.g infected	Fo30-2	AA	TT	TTATAA - TTATAA	G0/G0
T.b.g infected	Fo32-6	AG	TG	TTATAA - TTATAA	G1/G0
T.b.g infected	Fo33-6	AA	TT	TTATAA - TTATAA	G0/G0
T.b.g infected	Fo34-6	AG	TG	TTATAA - TTATAA	G1/G0
T.b.g infected	Fo34-7	AG	TG	TTATAA - TTATAA	G1/G0
T.b.g infected	Fo35-1	AG	TG	TTATAA - TTATAA	G1/G0
T.b.g infected	Fo36-6a	AG	TT	TTATAA - TTATAA	G1G/G0
T.b.g infected	Fo40-1	AA	TT	TTATAA - del6	G0/G2
T.b.g infected	Fo42-1	AA	TT	TTATAA - TTATAA	G0/G0
T.b.g infected	Fo43-6	AA	TT	TTATAA - TTATAA	G0/G0
T.b.g infected	Fo44-1	AG	TG	TTATAA - TTATAA	G1/G0
T.b.g infected	Fo45-1	AA	TT	TTATAA - TTATAA	G0/G0
T.b.g infected	Fo47-6	AG	TG	TTATAA - TTATAA	G1/G0
T.b.g infected	Fo5-2	AA	TT	TTATAA - del6	G0/G2
T.b.g infected	Fo50-1	AG	TG	TTATAA - TTATAA	G1/G0
T.b.g infected	Fo52-6	AA	TT	TTATAA - TTATAA	G0/G0
T.b.g infected	Fo58-15	AA	TT	TTATAA - del6	G0/G2
T.b.g infected	Fo58-6	AA	TT	TTATAA - TTATAA	G0/G0
T.b.g infected	Fo68-6	AA	TT	TTATAA - del6	G0/G2
T.b.g infected	Fo70-6	AG	TG	TTATAA - TTATAA	G1/G0
T.b.g infected	Fo74-6	AA	TT	TTATAA - del6	G0/G2
T.b.g infected	Fo75-1 (DCD)	AA	TT	TTATAA - del6	G0/G2
T.b.g infected	Fo77-6	AG	TG	TTATAA - del6	G1/G2
T.b.g infected	Fo8-1	AA	TT	TTATAA - del6	G0/G2
T.b.g infected	GG6B	AG	TG	TTATAA - TTATAA	G1/G0

## Sheet: Table 2 – source data 2
APOL1 G1 CKD risk variant	Genotype	Dominant model - Infection
		T.b.g infected		Control		Association analysis T.b.g infected/Control
		Number	%	Number	%	OR [95% CI]	P
rs73885319	A>G
G1G	A/G or G/G	79	34.8	32	30.8	1.20 [0.73 to 1.99]	0.48
Ancestral	A/A	148	65.2	72	69.2
Total		227	100	104	100
rs60910145	T>G
G1M	T/G or G/G	76	33.5	30	28.8	1.24 [0.75 to 2.08]	0.41
Ancestral	T/T	151	66.5	74	71.2
Total		227	100	104	100
