# Supplementary material for: APOL1 renal risk variants have contrasting resistance and susceptibility associations with African trypanosomiasis
Source: eLife. 2017 May 24;6:e25461. doi: 10.7554/eLife.25461 (PMC5495568; doi:10.7554/eLife.25461)
Supplement: Table 3—source data 1. — *Individuals excluded from the APOL1 G1 association analysis. T.b.g: T.b. gambiense, G0: genotype compatible with the non-risk G0 allele for both rs73885319 and rs60910145, G1: genotype compatible with the G1 CKD risk allele for both rs73885319 and rs60910145, G1M: genotype compatible with the G1 CKD risk allele for rs60910145 and the non-risk G0 allele for rs73885319, G1G: genotype compatible with the G1 CKD risk allele for rs73885319 and the non-risk G0 allele for rs60910145, G2: genotype compatible with the G2 CKD risk allele for rs71785313. DOI: http://dx.doi.org/10.7554/eLife.25461.011 [file elife-25461-table3-data1.xlsx]

## Sheet: Table 3 – source data 1
SAMPLE TYPE	SAMPLE CODE	SNP GENOTYPE			DESIGNATED APOL1 GENOTYPE
		rs73885319 (G1G)	rs60910145 (G1M)	rs71785313 (G2)
		A>G	T>G	TTATAA>del6
T.b.g HAT patient	A52	AA	TT	TTATAA - del6	G0/G2
T.b.g HAT patient	A53	AG	TG	TTATAA - del6	G1/G2
T.b.g HAT patient	A54	AA	TT	TTATAA - del6	G0/G2
T.b.g HAT patient	A57	AA	TT	TTATAA - del6	G0/G2
T.b.g HAT patient	Bo1-6	AA	TT	del6 - del6	G2/G2
T.b.g HAT patient	Bo10-6	AG	TG	TTATAA - TTATAA	G1/G0
T.b.g HAT patient	Bo110-6	GG	GG	TTATAA - TTATAA	G1/G1
T.b.g HAT patient	Bo2-6	AG	TG	TTATAA - TTATAA	G1/G0
T.b.g HAT patient	Bo230-6a	AG	TT	TTATAA - TTATAA	G1G/G0
T.b.g HAT patient	Bo270-1	AA	TT	TTATAA - TTATAA	G0/G0
T.b.g HAT patient	Bo271-1	AA	TT	TTATAA - del6	G0/G2
T.b.g HAT patient	Bo273-2	AG	TG	TTATAA - TTATAA	G1/G0
T.b.g HAT patient	Bo276-6	AA	TT	TTATAA - del6	G0/G2
T.b.g HAT patient	Bo277-2	AG	TG	TTATAA - TTATAA	G1/G0
T.b.g HAT patient	Bo280-1	AA	TT	TTATAA - del6	G0/G2
T.b.g HAT patient	Bo284-1	AG	TG	TTATAA - TTATAA	G1/G0
T.b.g HAT patient	Bo288-6	AA	TT	TTATAA - TTATAA	G0/G0
T.b.g HAT patient	Bo292-1	AA	TT	del6 - del6	G2/G2
T.b.g HAT patient	Bo294-2	AA	TT	del6 - del6	G2/G2
T.b.g HAT patient	Bo296-1	AA	TT	TTATAA - del6	G0/G2
T.b.g HAT patient	Bo298-1	AG	TG	TTATAA - TTATAA	G1/G0
T.b.g HAT patient	Bo3-6	AA	TT	TTATAA - del6	G0/G2
T.b.g HAT patient	Bo306-3	AG	TG	TTATAA - TTATAA	G1/G0
T.b.g HAT patient	Bo310-1	AG	TG	TTATAA - TTATAA	G1/G0
T.b.g HAT patient	Bo310-2	AG	TG	TTATAA - TTATAA	G1/G0
T.b.g HAT patient	Bo312-2	AA	TT	TTATAA - TTATAA	G0/G0
T.b.g HAT patient	Bo318-2	AA	TT	TTATAA - TTATAA	G0/G0
T.b.g HAT patient	Bo352-2	AA	TT	TTATAA - TTATAA	G0/G0
T.b.g HAT patient	Bo354-1	AA	TT	TTATAA - TTATAA	G0/G0
T.b.g HAT patient	Bo361-2	AA	TT	TTATAA - TTATAA	G0/G0
T.b.g HAT patient	Bo367-1	AG	TG	TTATAA - TTATAA	G1/G0
T.b.g HAT patient	Bo4-6	AG	TG	TTATAA - TTATAA	G1/G0
T.b.g HAT patient	Bo412-6	AA	TT	TTATAA - TTATAA	G0/G0
T.b.g HAT patient	Bo418-6	AA	TT	TTATAA - TTATAA	G0/G0
T.b.g HAT patient	Bo441-6a	AA	GG	TTATAA - TTATAA	G1M/G1M
T.b.g HAT patient	Bo442-6	AA	TT	TTATAA - TTATAA	G0/G0
T.b.g HAT patient	Bo443-6a	AG	TT	TTATAA - del6	G1G/G2
T.b.g HAT patient	Bo444-6	AA	TT	TTATAA - del6	G0/G2
T.b.g HAT patient	Bo445-6	AA	TT	TTATAA - del6	G0/G2
T.b.g HAT patient	Bo446-6a	AA	TG	TTATAA - TTATAA	G1M/G0
T.b.g HAT patient	Bo447-6a	AG	TT	TTATAA - del6	G1G/G2
T.b.g HAT patient	Bo5-6	AA	TT	TTATAA - TTATAA	G0/G0
T.b.g HAT patient	Bo6-6	AA	TT	TTATAA - del6	G0/G2
T.b.g HAT patient	Bo7-6	AA	TT	del6 - del6	G2/G2
T.b.g HAT patient	Bo8-10	AA	TT	TTATAA - TTATAA	G0/G0
T.b.g HAT patient	Bo8-6	AA	TT	TTATAA - del6	G0/G2
T.b.g HAT patient	Bo9-6	AG	TG	TTATAA - del6	G1/G2
T.b.g HAT patient	Bo91-7	AG	TG	TTATAA - TTATAA	G1/G0
T.b.g HAT patient	Bo92-1	AG	TG	TTATAA - TTATAA	G1/G0
T.b.g HAT patient	Du11-6	AA	TT	TTATAA - del6	G0/G2
T.b.g HAT patient	Du113-6	AA	TT	TTATAA - del6	G0/G2
T.b.g HAT patient	Du114-6	AA	TT	TTATAA - del6	G0/G2
T.b.g HAT patient	Du115-6	AA	TT	TTATAA - del6	G0/G2
T.b.g HAT patient	Du117-6	AA	TT	TTATAA - TTATAA	G0/G0
T.b.g HAT patient	Du119-6	AA	TT	TTATAA - TTATAA	G0/G0
T.b.g HAT patient	Du12-6	AA	TT	TTATAA - del6	G0/G2
T.b.g HAT patient	Du121-6	AA	TT	TTATAA - del6	G0/G2
T.b.g HAT patient	Du123-6	AA	TT	TTATAA - del6	G0/G2
T.b.g HAT patient	Du125-6	AG	TG	TTATAA - TTATAA	G1/G0
T.b.g HAT patient	Du129-6	AA	TT	TTATAA - TTATAA	G0/G0
T.b.g HAT patient	Du13-15	AG	TG	TTATAA - del6	G1/G2
T.b.g HAT patient	Du13-6	AA	TT	TTATAA - TTATAA	G0/G0
T.b.g HAT patient	Du130-6	AA	TT	TTATAA - del6	G0/G2
T.b.g HAT patient	Du132-6	AG	TG	TTATAA - TTATAA	G1/G0
T.b.g HAT patient	Du136-6	AA	TT	TTATAA - TTATAA	G0/G0
T.b.g HAT patient	Du14-6	AG	TG	TTATAA - TTATAA	G1/G0
T.b.g HAT patient	Du143-6	AA	TT	TTATAA - TTATAA	G0/G0
T.b.g HAT patient	Du148-6(dcd)	AA	TT	TTATAA - del6	G0/G2
T.b.g HAT patient	Du149-6	AA	TT	TTATAA - TTATAA	G0/G0
T.b.g HAT patient	Du15-6	AA	TT	TTATAA - TTATAA	G0/G0
T.b.g HAT patient	Du150-6	AA	TT	TTATAA - del6	G0/G2
T.b.g HAT patient	Du152-6	AA	TT	TTATAA - TTATAA	G0/G0
T.b.g HAT patient	Du153-2	AA	TT	TTATAA - del6	G0/G2
T.b.g HAT patient	Du153-6	AA	TT	TTATAA - TTATAA	G0/G0
T.b.g HAT patient	Du155-6(dcd)	AA	TT	TTATAA - TTATAA	G0/G0
T.b.g HAT patient	Du156-6	AA	TT	TTATAA - del6	G0/G2
T.b.g HAT patient	Du158-6	AA	TT	TTATAA - TTATAA	G0/G0
T.b.g HAT patient	Du16-6	AG	TG	TTATAA - TTATAA	G1/G0
T.b.g HAT patient	Du16-7	AA	TT	TTATAA - TTATAA	G0/G0
T.b.g HAT patient	Du163-6	AA	TT	TTATAA - TTATAA	G0/G0
T.b.g HAT patient	Du165-6	AA	TT	TTATAA - TTATAA	G0/G0
T.b.g HAT patient	Du167-6	AA	TT	del6 - del6	G2/G2
T.b.g HAT patient	Du168-6(dcd)	AA	TT	TTATAA - del6	G0/G2
T.b.g HAT patient	Du17-6	AA	TT	TTATAA - TTATAA	G0/G0
T.b.g HAT patient	Du171-6	AA	TT	del6 - del6	G2/G2
T.b.g HAT patient	Du172-6	AA	TT	TTATAA - del6	G0/G2
T.b.g HAT patient	Du18-6	GG	GG	TTATAA - TTATAA	G1/G1
T.b.g HAT patient	Du180-6	AG	TG	TTATAA - TTATAA	G1/G0
T.b.g HAT patient	Du182-6	AG	TG	TTATAA - TTATAA	G1/G0
T.b.g HAT patient	Du184-6	AA	TT	TTATAA - TTATAA	G0/G0
T.b.g HAT patient	Du188-6	AA	TT	TTATAA - del6	G0/G2
T.b.g HAT patient	Du19-6	AA	TT	TTATAA - TTATAA	G0/G0
T.b.g HAT patient	Du190-6(dcd)	AG	TG	TTATAA - del6	G1/G2
T.b.g HAT patient	Du192-6	AG	TG	TTATAA - TTATAA	G1/G0
T.b.g HAT patient	Du194-6	AA	TT	TTATAA - TTATAA	G0/G0
T.b.g HAT patient	Du20-6	AA	TT	TTATAA - TTATAA	G0/G0
T.b.g HAT patient	Du21-6	AA	TT	TTATAA - del6	G0/G2
T.b.g HAT patient	Du210-6	AA	TT	TTATAA - TTATAA	G0/G0
T.b.g HAT patient	Du213-6	GG	TG	TTATAA - TTATAA	G1G/G1
T.b.g HAT patient	Du214-6	AA	TT	TTATAA - TTATAA	G0/G0
T.b.g HAT patient	Du218-6	AA	TT	TTATAA - del6	G0/G2
T.b.g HAT patient	Du22-6	AA	TT	TTATAA - TTATAA	G0/G0
T.b.g HAT patient	Du22-9	AA	TT	TTATAA - TTATAA	G0/G0
T.b.g HAT patient	Du220-6	GG	GG	TTATAA - TTATAA	G1/G1
T.b.g HAT patient	Du224-6	AA	TT	TTATAA - TTATAA	G0/G0
T.b.g HAT patient	Du226-6(dcd)	AA	TT	TTATAA - TTATAA	G0/G0
T.b.g HAT patient	Du228-6	AA	TT	TTATAA - TTATAA	G0/G0
T.b.g HAT patient	Du23-6	AA	TT	TTATAA - TTATAA	G0/G0
T.b.g HAT patient	Du232-6	AA	TT	TTATAA - TTATAA	G0/G0
T.b.g HAT patient	Du24-6	AG	TG	TTATAA - del6	G1/G2
T.b.g HAT patient	Du248-6	AA	TT	TTATAA - TTATAA	G0/G0
T.b.g HAT patient	Du249-6a	AG	TT	TTATAA - TTATAA	G1G/G0
T.b.g HAT patient	Du25-6	AA	TT	TTATAA - TTATAA	G0/G0
T.b.g HAT patient	Du257-6	AA	TT	TTATAA - TTATAA	G0/G0
T.b.g HAT patient	Du26-6	AA	TT	TTATAA - TTATAA	G0/G0
T.b.g HAT patient	Du27-6	AA	TT	TTATAA - TTATAA	G0/G0
T.b.g HAT patient	Du28-6	AA	TT	TTATAA - TTATAA	G0/G0
T.b.g HAT patient	Du29-6	AG	TG	TTATAA - TTATAA	G1/G0
T.b.g HAT patient	Du30-6	AA	TT	TTATAA - del6	G0/G2
T.b.g HAT patient	Du31-6	AA	TT	TTATAA - del6	G0/G2
T.b.g HAT patient	Du32-6	AA	TT	TTATAA - TTATAA	G0/G0
T.b.g HAT patient	Du33-6	AA	TT	TTATAA - del6	G0/G2
T.b.g HAT patient	Du35-6	GG	GG	TTATAA - TTATAA	G1/G1
T.b.g HAT patient	Du36-6	AA	TT	TTATAA - del6	G0/G2
T.b.g HAT patient	Du37-15	AA	TT	TTATAA - del6	G0/G2
T.b.g HAT patient	Du376-2	AA	TT	TTATAA - TTATAA	G0/G0
T.b.g HAT patient	Du376-6	AA	TT	TTATAA - TTATAA	G0/G0
T.b.g HAT patient	Du38-21	AG	TG	TTATAA - TTATAA	G1/G0
T.b.g HAT patient	Du38-6	AA	TT	TTATAA - TTATAA	G0/G0
T.b.g HAT patient	Du383-6	AG	TG	TTATAA - TTATAA	G1/G0
T.b.g HAT patient	Du385-6	AA	TT	TTATAA - TTATAA	G0/G0
T.b.g HAT patient	Du391-6	AA	TT	TTATAA - TTATAA	G0/G0
T.b.g HAT patient	Du394-6	AA	TT	TTATAA - TTATAA	G0/G0
T.b.g HAT patient	Du396-6	AA	TT	TTATAA - TTATAA	G0/G0
T.b.g HAT patient	Du403-6	AA	TT	TTATAA - TTATAA	G0/G0
T.b.g HAT patient	Du404-6	GG	GG	TTATAA - TTATAA	G1/G1
T.b.g HAT patient	Du42-6	GG	GG	TTATAA - TTATAA	G1/G1
T.b.g HAT patient	Du46-6	AG	TG	TTATAA - TTATAA	G1/G0
T.b.g HAT patient	Du50-6(dcd)	AG	TG	TTATAA - del6	G1/G2
T.b.g HAT patient	Du57-2	AA	TT	TTATAA - del6	G0/G2
T.b.g HAT patient	Du72-6	AA	TT	TTATAA - TTATAA	G0/G0
T.b.g HAT patient	Du77-6	AA	TT	TTATAA - del6	G0/G2
T.b.g HAT patient	Fo1-1	AA	TT	TTATAA - TTATAA	G0/G0
T.b.g HAT patient	Fo15-2	AA	TT	TTATAA - del6	G0/G2
T.b.g HAT patient	Fo17-1	AA	TT	TTATAA - TTATAA	G0/G0
T.b.g HAT patient	Fo17-2	AA	TT	TTATAA - del6	G0/G2
T.b.g HAT patient	Fo17-3	AA	TT	TTATAA - TTATAA	G0/G0
T.b.g HAT patient	Fo22-6	AG	TG	TTATAA - TTATAA	G1/G0
T.b.g HAT patient	Fo23-6	AA	TT	TTATAA - del6	G0/G2
T.b.g HAT patient	Fo24-6	AA	TT	TTATAA - TTATAA	G0/G0
T.b.g HAT patient	Fo25-6	AA	TT	TTATAA - TTATAA	G0/G0
T.b.g HAT patient	Fo3-1	AA	TT	TTATAA - TTATAA	G0/G0
T.b.g HAT patient	Fo30-2	AA	TT	TTATAA - TTATAA	G0/G0
T.b.g HAT patient	Fo33-6	AA	TT	TTATAA - TTATAA	G0/G0
T.b.g HAT patient	Fo34-6	AG	TG	TTATAA - TTATAA	G1/G0
T.b.g HAT patient	Fo35-1	AG	TG	TTATAA - TTATAA	G1/G0
T.b.g HAT patient	Fo40-1	AA	TT	TTATAA - del6	G0/G2
T.b.g HAT patient	Fo42-1	AA	TT	TTATAA - TTATAA	G0/G0
T.b.g HAT patient	Fo43-6	AA	TT	TTATAA - TTATAA	G0/G0
T.b.g HAT patient	Fo5-2	AA	TT	TTATAA - del6	G0/G2
T.b.g HAT patient	Fo50-1	AG	TG	TTATAA - TTATAA	G1/G0
T.b.g HAT patient	Fo58-15	AA	TT	TTATAA - del6	G0/G2
T.b.g HAT patient	Fo58-6	AA	TT	TTATAA - TTATAA	G0/G0
T.b.g HAT patient	Fo68-6	AA	TT	TTATAA - del6	G0/G2
T.b.g HAT patient	Fo70-6	AG	TG	TTATAA - TTATAA	G1/G0
T.b.g HAT patient	Fo74-6	AA	TT	TTATAA - del6	G0/G2
T.b.g HAT patient	Fo77-6	AG	TG	TTATAA - del6	G1/G2
T.b.g Latent carrier	Bo101-2	AA	TT	TTATAA - TTATAA	G0/G0
T.b.g Latent carrier	Bo271-2	AA	TT	TTATAA - TTATAA	G0/G0
T.b.g Latent carrier	Bo274-2	AA	TT	TTATAA - TTATAA	G0/G0
T.b.g Latent carrier	Bo278-2	AG	TG	TTATAA - TTATAA	G1/G0
T.b.g Latent carrier	Bo286-3a	AA	TG	TTATAA - TTATAA	G1M/G0
T.b.g Latent carrier	Bo290-1	AG	TG	TTATAA - TTATAA	G1/G0
T.b.g Latent carrier	Bo308-1	AA	TT	TTATAA - del6	G0/G2
T.b.g Latent carrier	Bo320-1	AA	TT	TTATAA - TTATAA	G0/G0
T.b.g Latent carrier	Bo360-1	AG	TG	TTATAA - del6	G1/G2
T.b.g Latent carrier	Bo366-1	AG	TG	TTATAA - TTATAA	G1/G0
T.b.g Latent carrier	Bo407-6	AA	TT	TTATAA - TTATAA	G0/G0
T.b.g Latent carrier	Bo458-6	AG	TG	TTATAA - TTATAA	G1/G0
T.b.g Latent carrier	Bo82-1	AA	TT	TTATAA - TTATAA	G0/G0
T.b.g Latent carrier	Bo82-6	AA	TT	TTATAA - TTATAA	G0/G0
T.b.g Latent carrier	Bo84-1	GG	GG	TTATAA - TTATAA	G1/G1
T.b.g Latent carrier	Bo90-1	AA	TT	TTATAA - TTATAA	G0/G0
T.b.g Latent carrier	Bo91-2	AA	TT	TTATAA - TTATAA	G0/G0
T.b.g Latent carrier	DCD	AA	TT	TTATAA - TTATAA	G0/G0
T.b.g Latent carrier	Do/333/340/2	AA	TT	TTATAA - TTATAA	G0/G0
T.b.g Latent carrier	Du111-6	AG	TG	TTATAA - TTATAA	G1/G0
T.b.g Latent carrier	Du122-6	AA	TT	TTATAA - TTATAA	G0/G0
T.b.g Latent carrier	Du126-6(dcd)	AG	TG	TTATAA - TTATAA	G1/G0
T.b.g Latent carrier	Du128-6(dcd)	AG	TG	TTATAA - TTATAA	G1/G0
T.b.g Latent carrier	Du131-6a	AG	TT	TTATAA - TTATAA	G1G/G0
T.b.g Latent carrier	Du135-6	AG	TG	TTATAA - TTATAA	G1/G0
T.b.g Latent carrier	Du137-6	AG	TG	TTATAA - TTATAA	G1/G0
T.b.g Latent carrier	Du141-6	AA	TT	TTATAA - TTATAA	G0/G0
T.b.g Latent carrier	Du142-6	AA	TT	TTATAA - TTATAA	G0/G0
T.b.g Latent carrier	Du144-6	AG	TG	TTATAA - TTATAA	G1/G0
T.b.g Latent carrier	Du157-6	GG	GG	TTATAA - TTATAA	G1/G1
T.b.g Latent carrier	Du160-6	AG	TG	TTATAA - del6	G1/G2
T.b.g Latent carrier	Du162-6	AG	TG	TTATAA - del6	G1/G2
T.b.g Latent carrier	Du169-6	AG	TG	TTATAA - TTATAA	G1/G0
T.b.g Latent carrier	Du170-6	AA	TT	TTATAA - del6	G0/G2
T.b.g Latent carrier	Du174-6	AA	TT	TTATAA - TTATAA	G0/G0
T.b.g Latent carrier	Du178-6	AG	TG	TTATAA - TTATAA	G1/G0
T.b.g Latent carrier	Du202-6	AA	TT	TTATAA - TTATAA	G0/G0
T.b.g Latent carrier	Du206-6	AG	TG	TTATAA - TTATAA	G1/G0
T.b.g Latent carrier	Du208-6	AG	TG	TTATAA - TTATAA	G1/G0
T.b.g Latent carrier	Du212-6	AA	TT	TTATAA - TTATAA	G0/G0
T.b.g Latent carrier	Du222-6	AG	TG	TTATAA - del6	G1/G2
T.b.g Latent carrier	Du31-1	AA	TT	TTATAA - TTATAA	G0/G0
T.b.g Latent carrier	Du370-6	AG	TG	TTATAA - del6	G1/G2
T.b.g Latent carrier	Du53-2(dcd)	AG	TG	TTATAA - TTATAA	G1/G0
T.b.g Latent carrier	Du66-6	AG	TG	TTATAA - TTATAA	G1/G0
T.b.g Latent carrier	Du70-1	AA	TT	TTATAA - TTATAA	G0/G0
T.b.g Latent carrier	Fo10-10	GG	TG	TTATAA - TTATAA	G1G/G1
T.b.g Latent carrier	Fo12-6	AA	TT	TTATAA - TTATAA	G0/G0
T.b.g Latent carrier	Fo20-1	AA	TT	TTATAA - TTATAA	G0/G0
T.b.g Latent carrier	Fo29-2	AG	TG	TTATAA - TTATAA	G1/G0
T.b.g Latent carrier	Fo32-6	AG	TG	TTATAA - TTATAA	G1/G0
T.b.g Latent carrier	Fo34-7	AG	TG	TTATAA - TTATAA	G1/G0
T.b.g Latent carrier	Fo36-6a	AG	TT	TTATAA - TTATAA	G1G/G0
T.b.g Latent carrier	Fo44-1	AG	TG	TTATAA - TTATAA	G1/G0
T.b.g Latent carrier	Fo45-1	AA	TT	TTATAA - TTATAA	G0/G0
T.b.g Latent carrier	Fo47-6	AG	TG	TTATAA - TTATAA	G1/G0
T.b.g Latent carrier	Fo52-6	AA	TT	TTATAA - TTATAA	G0/G0
T.b.g Latent carrier	Fo75-1(DCD)	AA	TT	TTATAA - del6	G0/G2
T.b.g Latent carrier	Fo8-1	AA	TT	TTATAA - del6	G0/G2
T.b.g Latent carrier	GG6B	AG	TG	TTATAA - TTATAA	G1/G0

## Sheet: Table 3 - source data 2
APOL1 G1 CKD risk variant	Genotype	Dominant model – Infection outcome
		T.b.g Disease		T.b.g Carriage		Association analysis T.b.g Disease/Carriage
		Number	%	Number	%	OR [95% CI]	P
rs73885319	A>G
G1G	A/G or G/G	47	28.1	32	53.3	0.34 [0.19 to 0.63]	0.0006
Ancestral	A/A	120	71.9	28	46.7
Total		167	100	60	100
rs60910145	T>G
G1M	T/G or G/G	45	26.9	31	51.7	0.35 [0.19 to 0.64]	0.0007
Ancestral	T/T	122	73.1	29	48.3
Total		167	100	60	100
